# Supplementary material for: Off Earth Identification of Bacterial Populations Using 16S rDNA Nanopore Sequencing
Source: MDPI journal article supplement (doi:10.3390/genes11010076), 2020-01-09
Supplement: s1 [file s1]

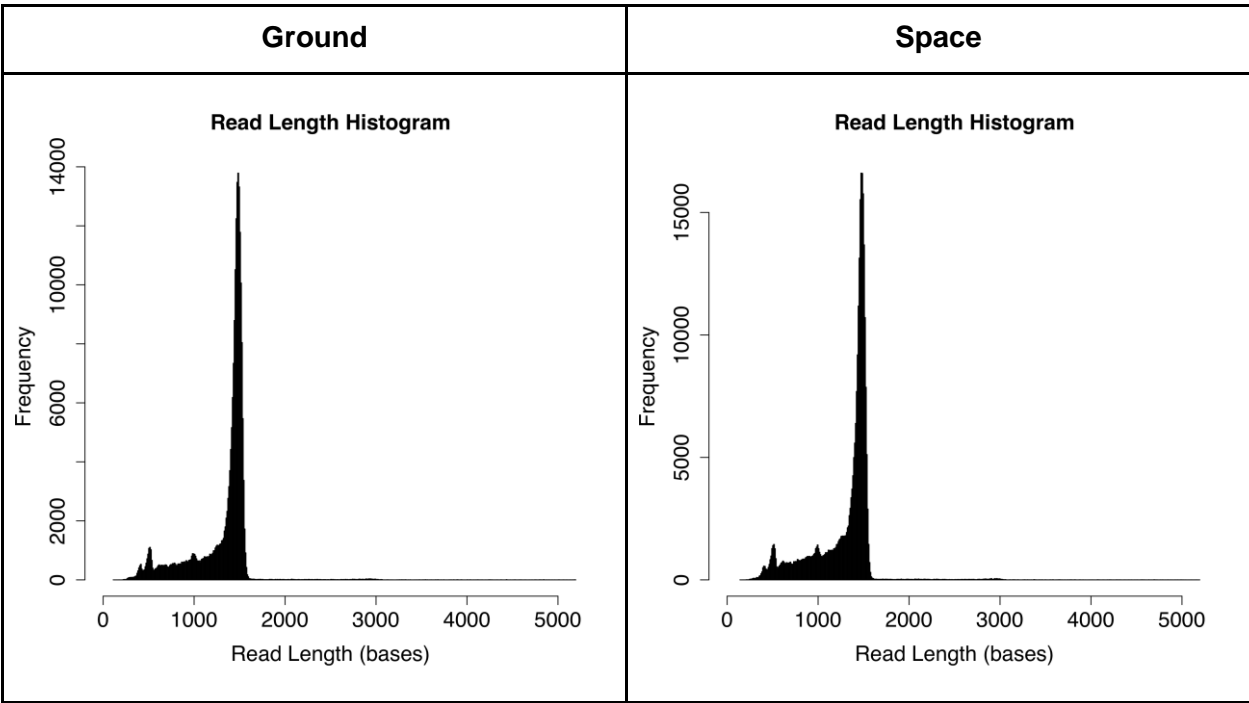

Supplementary Figure 1. Read length histograms for nanopore data from ground and space sequencing of ZymoBIOMICS Microbial Community Standard.

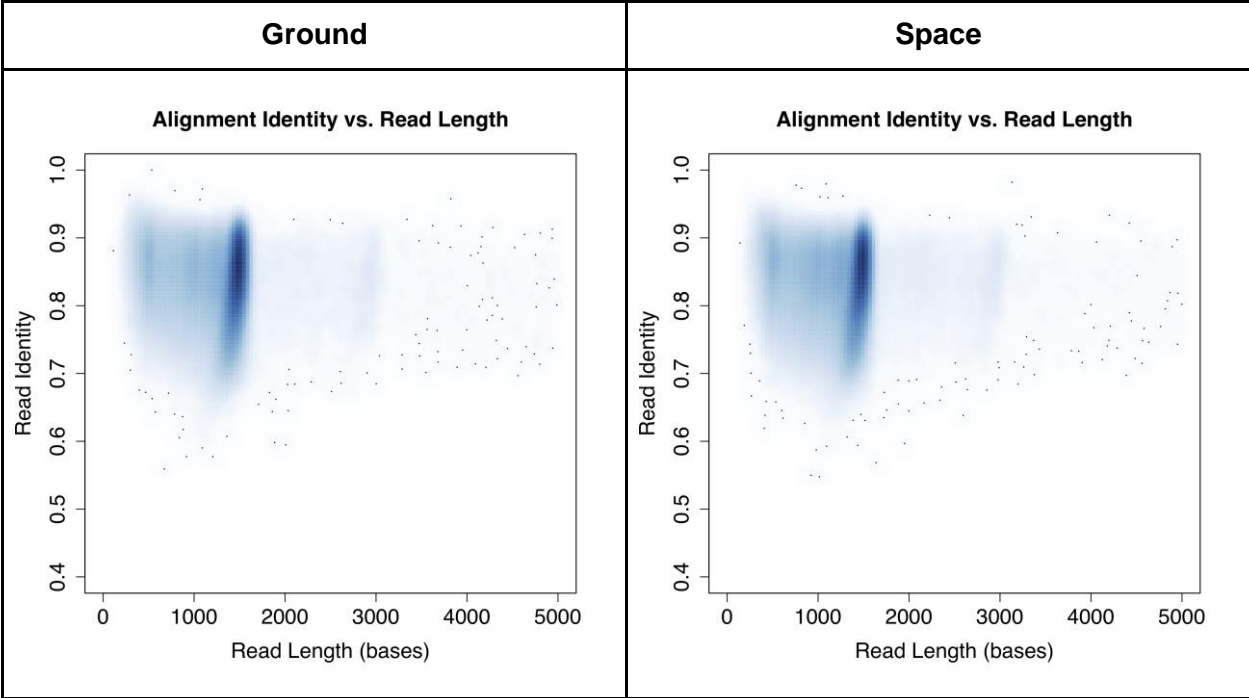

Supplementary Figure 2. Alignment identity vs. read length for nanopore data from ground and space sequencing of ZymoBIOMICS Microbial Community Standard.

Supplementary Table 1. Summary of Kraken output at the genus level for the ZymoBIOMICS Microbial Community Standard

| <b>Genus</b>          | <b>Proportion (%)</b> |                          |                         |
|-----------------------|-----------------------|--------------------------|-------------------------|
|                       | <b>MiSeq (Ground)</b> | <b>Nanopore (Ground)</b> | <b>Nanopore (Space)</b> |
| <i>Bacillus</i>       | 16.97                 | 18.05                    | 17.71                   |
| <i>Enterococcus</i>   | 0.37                  | 5.38                     | 5.01                    |
| <i>Escherichia</i>    | 1.13                  | 9.86                     | 11.23                   |
| <i>Lactobacillus</i>  | 13.64                 | 8.55                     | 8.42                    |
| <i>Listeria</i>       | 13.59                 | 8.86                     | 8.28                    |
| <i>Pseudomonas</i>    | 5.82                  | 0.9                      | 0.63                    |
| <i>Salmonella</i>     | 1.82                  | 4.8                      | 5.38                    |
| <i>Staphylococcus</i> | 17.9                  | 11.95                    | 11.45                   |
| Unclassified*         | 0.03                  | 15.47                    | 14.47                   |

\*The majority of unclassified reads from the nanopore data were either significantly shorter (<1kB) or longer (>2kB) than the expected 16S amplicon size, and are most likely due to spurious PCR products or ionic current aberrations.

Supplementary Table 2. Top 12 Species level identifications from nanopore sequencing flight data from EPI2ME.

| <b>Taxon</b>                          | <b>Cumulative Reads</b> |
|---------------------------------------|-------------------------|
| <i>Staphylococcus hominis</i>         | 14,674                  |
| <i>Staphylococcus capitis</i>         | 4,031                   |
| <i>Staphylococcus caprae</i>          | 1,440                   |
| <i>Staphylococcus saccharolyticus</i> | 862                     |
| <i>Staphylococcus petrasii</i>        | 859                     |
| <i>Staphylococcus haemolyticus</i>    | 233                     |
| <i>Staphylococcus aureus</i>          | 195                     |
| <i>Staphylococcus epidermidis</i>     | 173                     |
| <i>Staphylococcus devriesei</i>       | 165                     |
| <i>Staphylococcus saprophyticus</i>   | 88                      |
| <i>Staphylococcus lugdunensis</i>     | 77                      |
| <i>Staphylococcus cohnii</i>          | 75                      |

Supplementary Table 3. Top 12 species level **identification** of nanopore sequencing ground data from EPI2ME.

| <b>Taxon</b>                          | <b>Cumulative Reads</b> |
|---------------------------------------|-------------------------|
| <i>Staphylococcus hominis</i>         | 109,788                 |
| <i>Staphylococcus epidermidis</i>     | 9,107                   |
| <i>Staphylococcus petrasii</i>        | 5,635                   |
| <i>Staphylococcus saccharolyticus</i> | 3,958                   |
| <i>Staphylococcus haemolyticus</i>    | 1,666                   |
| <i>Staphylococcus capitis</i>         | 1,169                   |
| <i>Staphylococcus devriesei</i>       | 1,112                   |
| <i>Staphylococcus saprophyticus</i>   | 707                     |
| <i>Staphylococcus caprae</i>          | 544                     |
| <i>Staphylococcus aureus</i>          | 536                     |
| <i>Staphylococcus lugdunensis</i>     | 526                     |
| <i>Staphylococcus muscae</i>          | 526                     |

Supplementary Table 4. Summary of Kraken output at the genus level for bacteria cultured aboard ISS.

| Genus                 | Proportion (%) |                   |                  |
|-----------------------|----------------|-------------------|------------------|
|                       | MiSeq (Ground) | Nanopore (Ground) | Nanopore (Space) |
| <i>Staphylococcus</i> | 98.06          | 66.3              | 59.61            |
| <i>Bacillus</i>       | 0.06           | 4.95              | 5.03             |
| <i>Unclassified*</i>  | 0.02           | 19                | 24.53            |

\*The majority of unclassified reads from the nanopore data were either significantly shorter (<1kB) or longer (>2kB) than the expected 16S amplicon size, and are most likely due to spurious PCR products or ionic current aberrations.
